# Supplementary material
Source: publisher site journal article supplement (https://www.dovepress.com/article/597037)
Supplement: Supplementary file 1 [file 597037%20Supplementary_Material_1.docx]

Supplementary Material


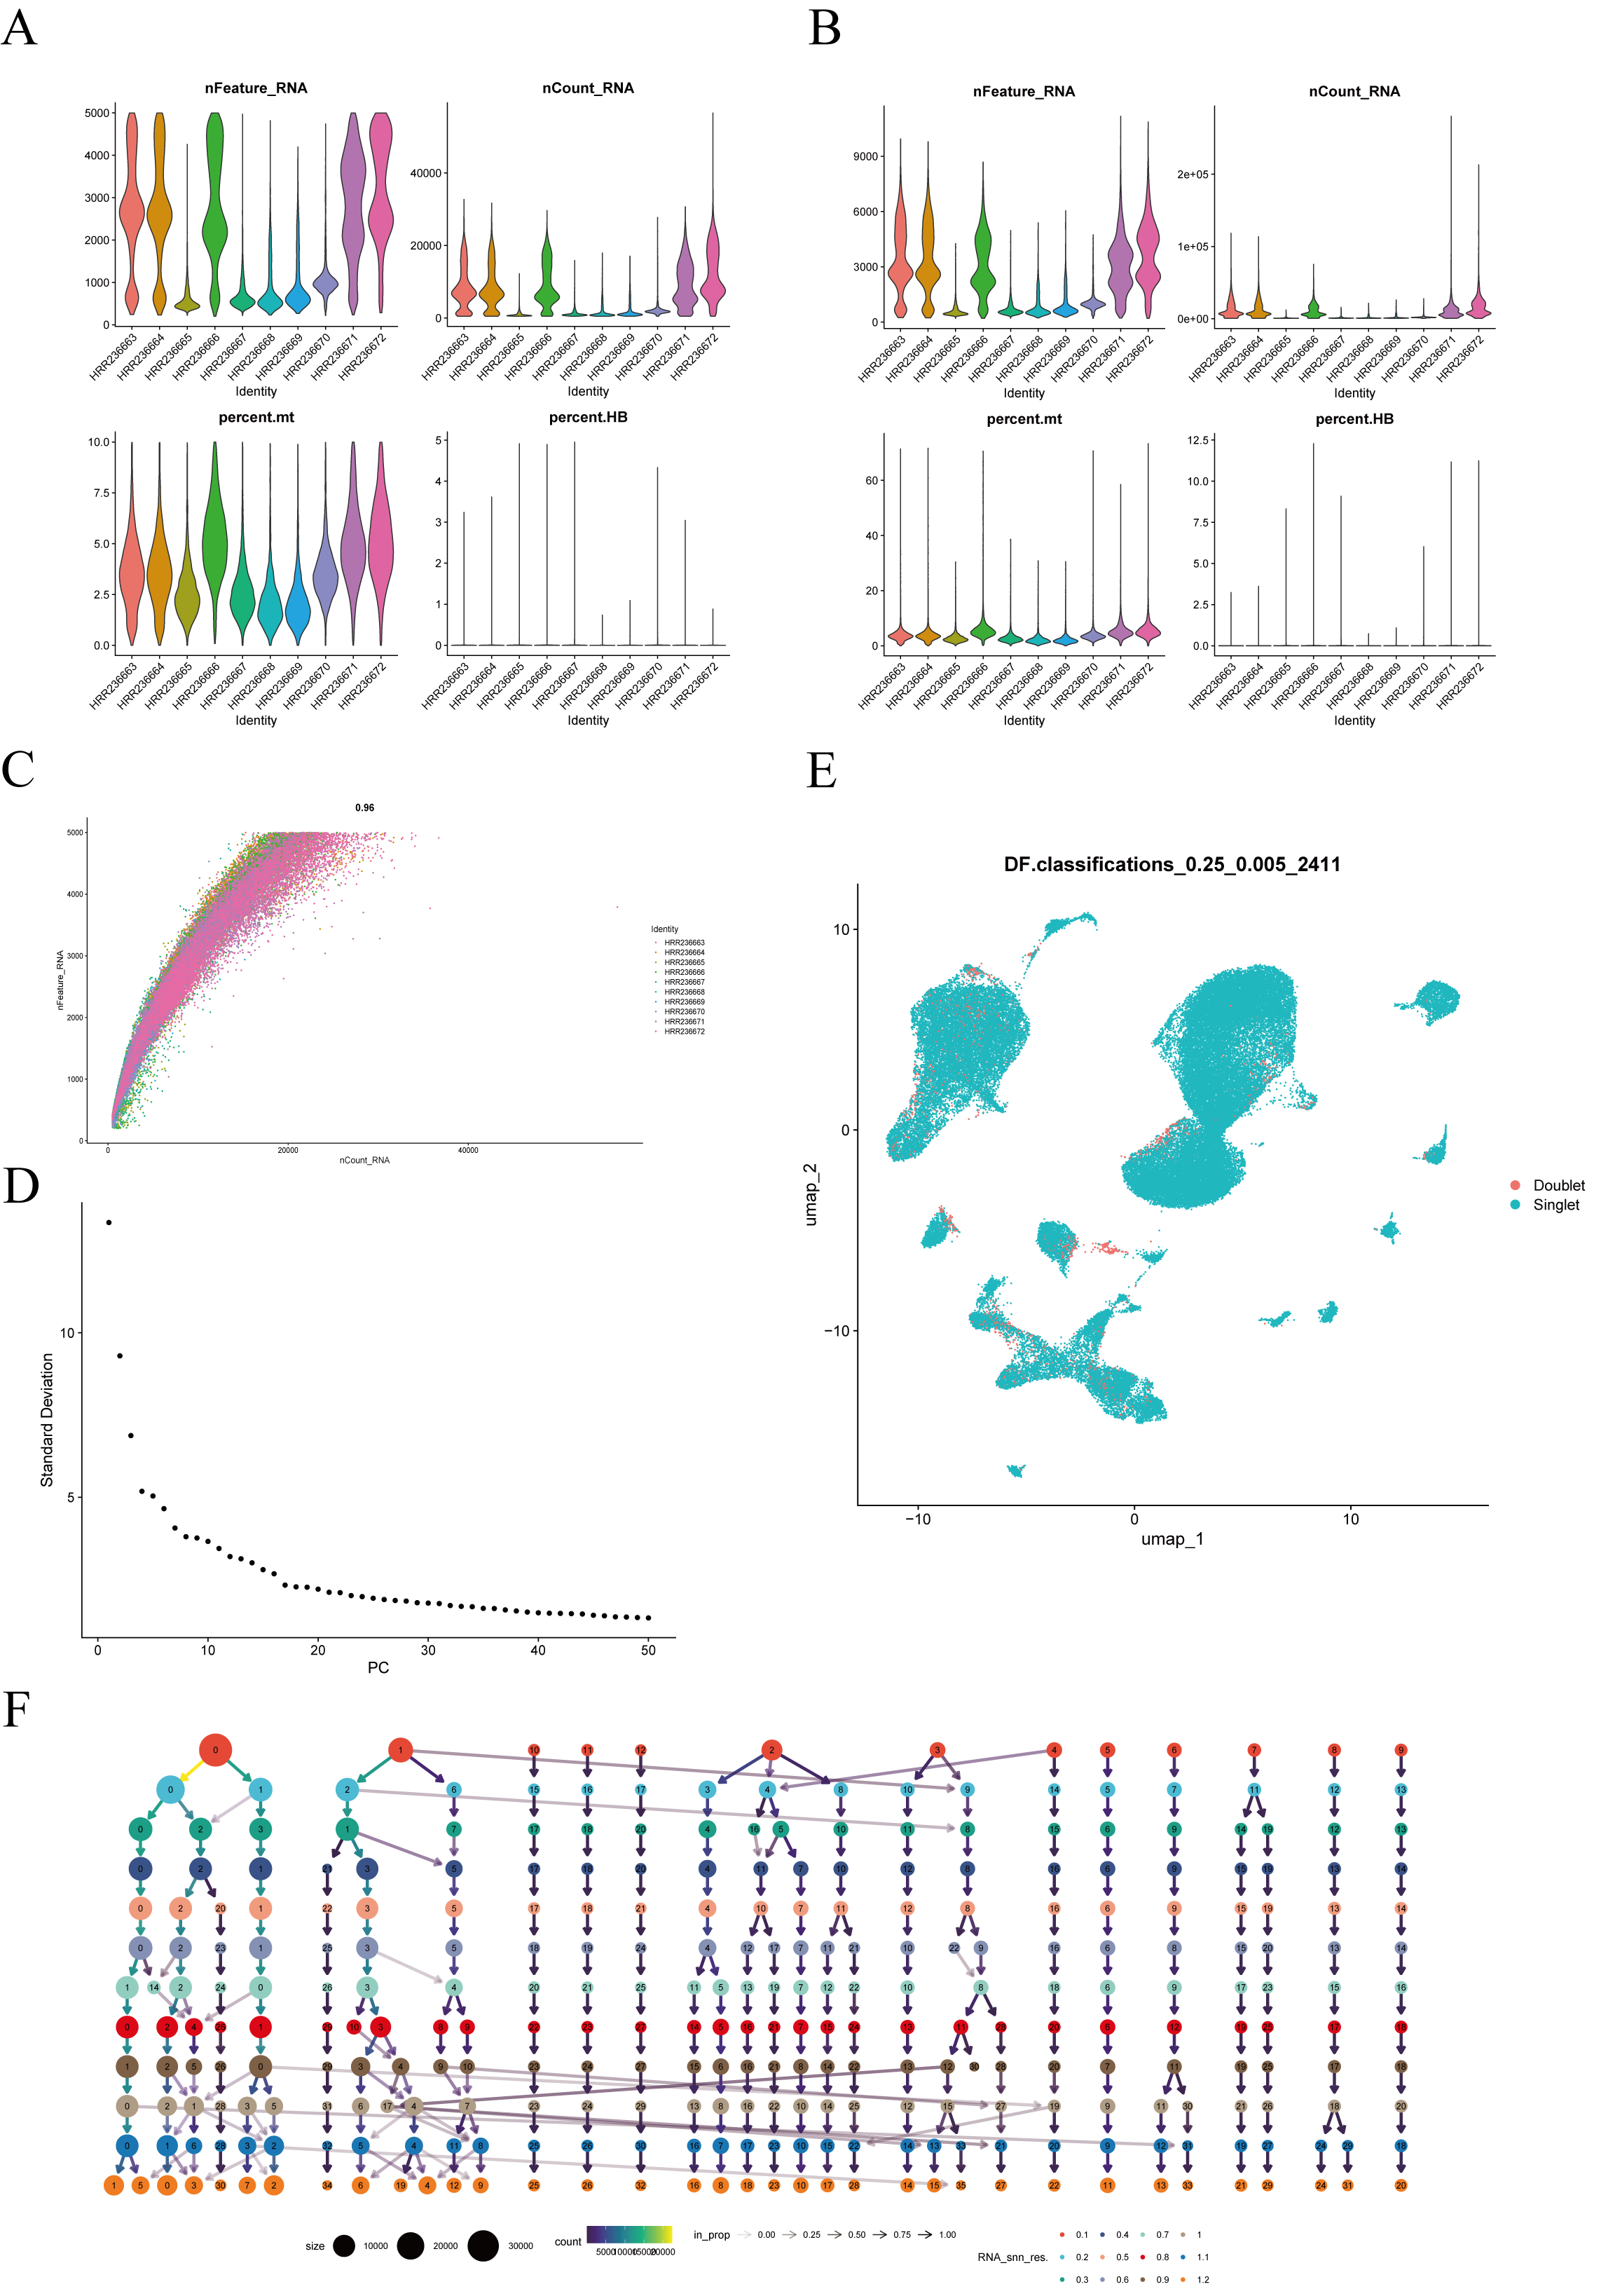


**Supplementary Figure 1. Quality control, batch correction, and doublet detection of integrated single-cell RNA-seq datasets.**

(A) Quality control metrics of cells before filtering, including the number of detected genes (nFeature_RNA), total counts (nCount_RNA), and percentage of mitochondrial genes (percent.mt). Violin plots show the distribution of these metrics across samples. (B) Quality control metrics after filtering, demonstrating improved data consistency following the removal of low-quality cells. (C) PCA plot before batch correction, showing evident batch effects among different datasets. (D) Variance explained by principal components (Elbow plot), used to determine the optimal number of PCs for downstream analysis. (E) UMAP visualization of doublet detection results using DoubletFinder. Predicted doublets and singlets are indicated by different colors. (F) Clustree visualization of clustering stability across different resolution parameters. Each node represents a cluster at a given resolution, with node size proportional to the number of cells within the cluster.


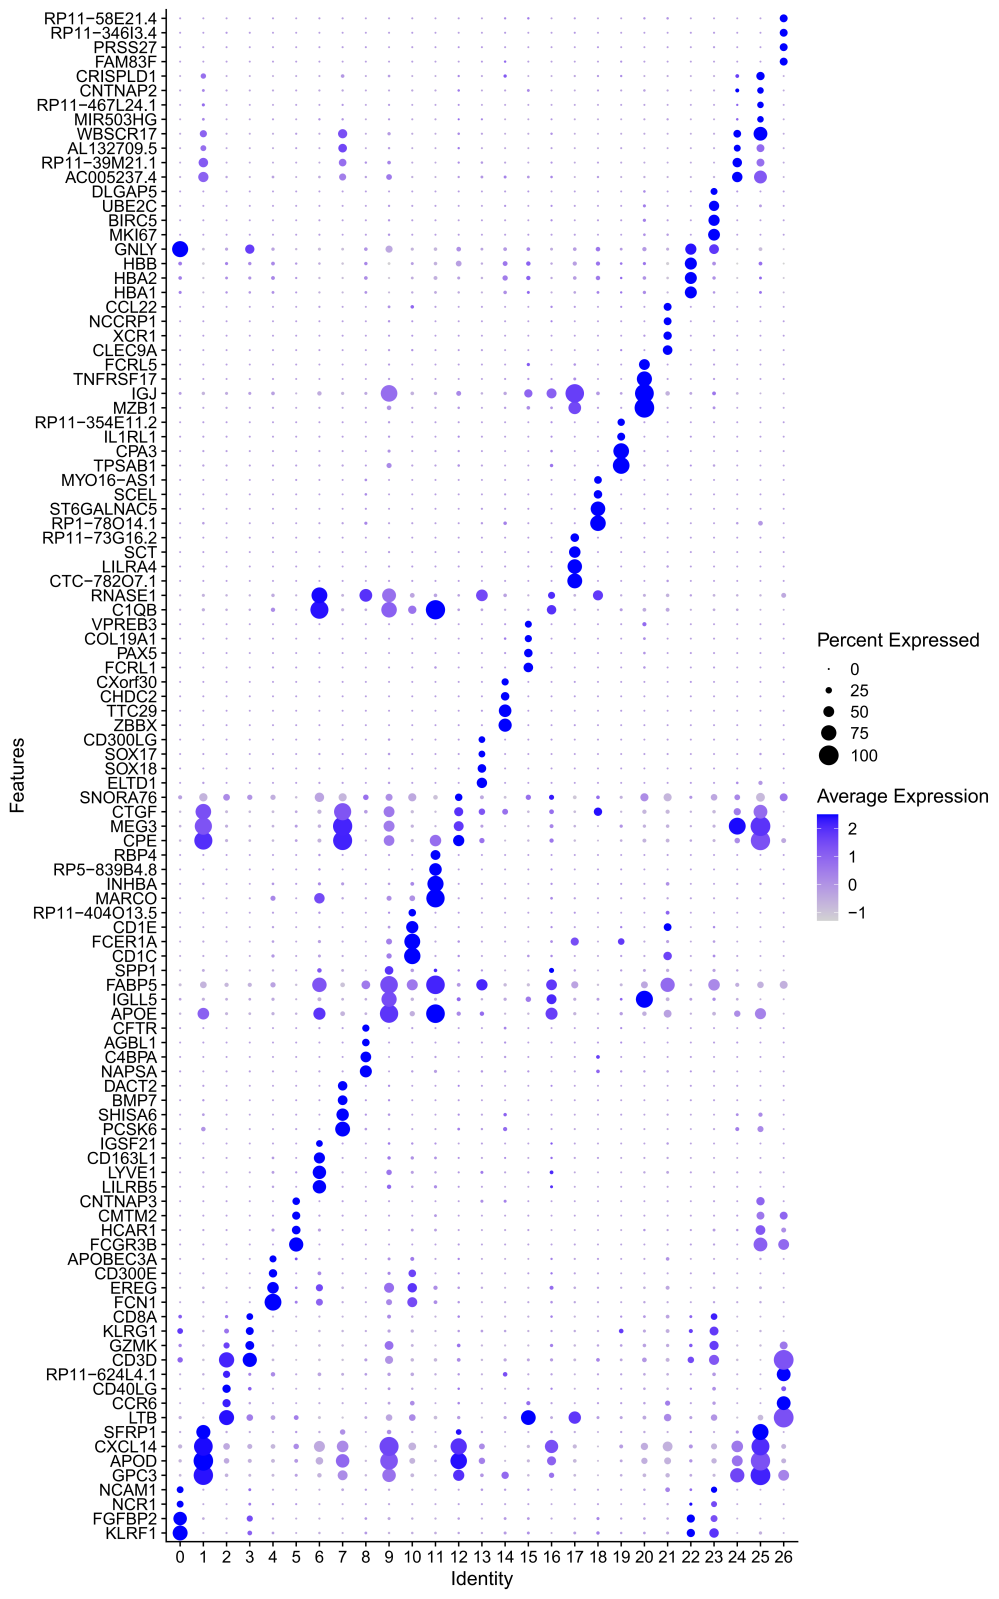


B


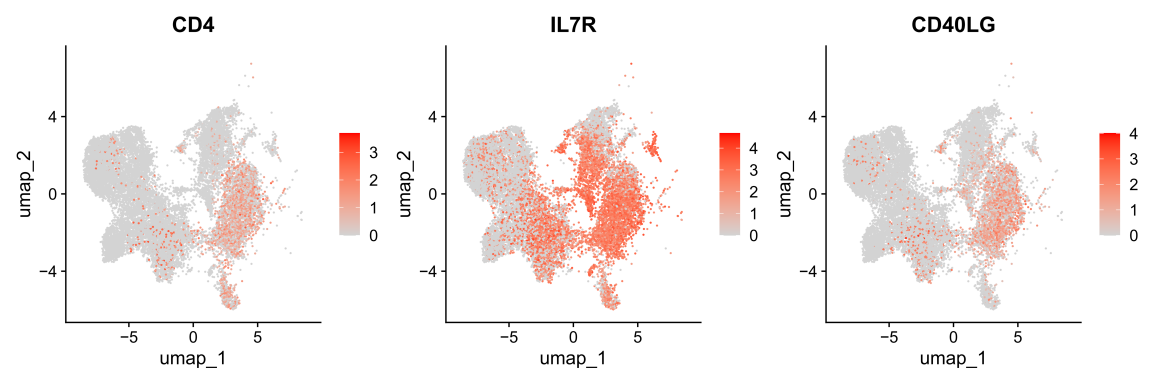


A

Supplementary Figure 2. Cell type annotation and identification of CD4⁺ T cells in scRNA-seq data. (A) Dot plot showing the expression patterns of canonical marker genes across all identified cell clusters. Dot size represents the percentage of cells expressing each gene, and color intensity indicates the average expression level. These results were used to support cell type annotation. (B) UMAP visualization of CD4⁺ T cell–related marker genes, including CD4, IL7R, and CD40LG. CD4 and IL7R were broadly expressed in T cell populations, while CD40LG was enriched in activated CD4⁺ T cell subsets, indicating functional heterogeneity within CD4⁺ T cells.

| A | B |
| --- | --- |
| 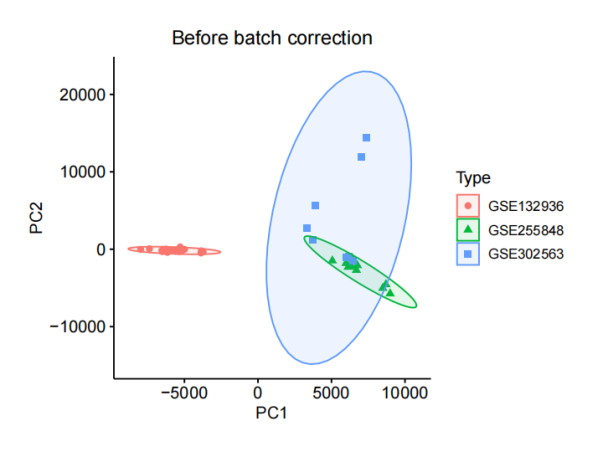 | 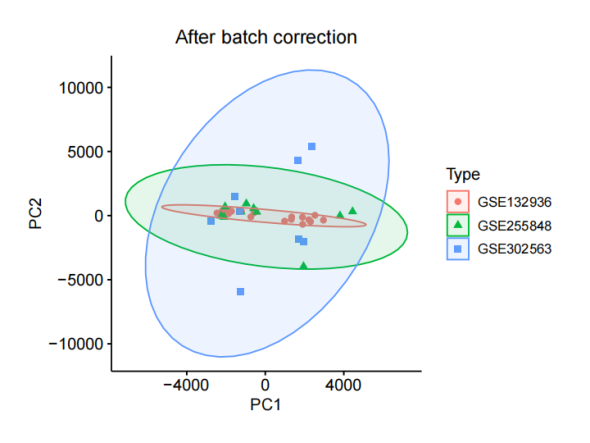 |

### Supplementary Figure 3. Cross-dataset integration analysis and batch effect correction effect evaluation. (A)PCA distribution diagram of samples from different GEO datasets before batch correction (B)PCA distribution diagram of the batch-corrected samples.


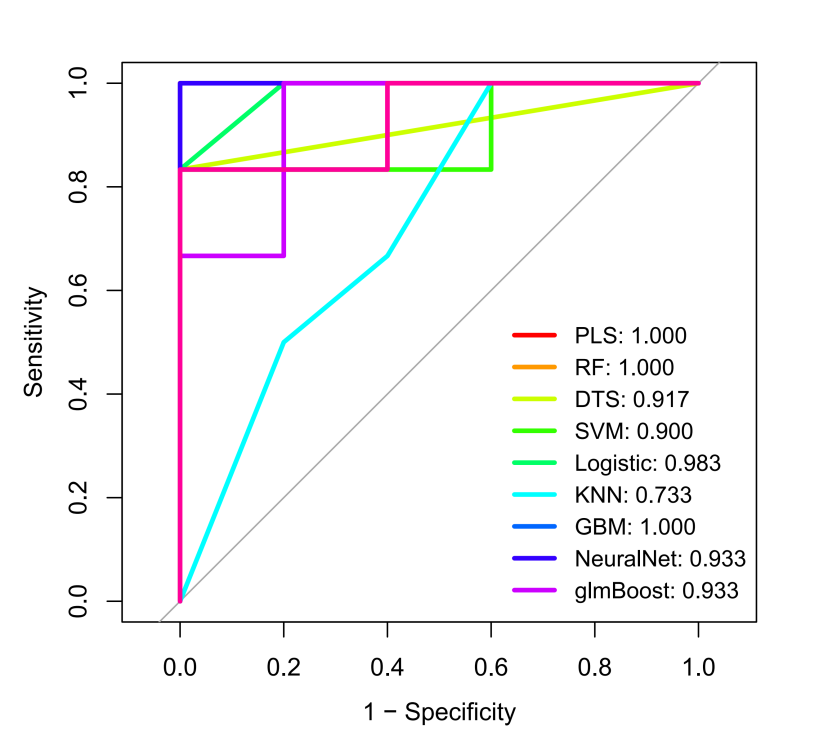


**Supplementary Figure 4**. Performance comparison of multiple machine learning models for classification. ROC curves of different machine learning models, including PLS, RF, DTS, SVM, logistic regression, KNN, GBM, neural network, and glmBoost. The AUC values are indicated in the legend. Logistic regression was selected for subsequent analysis due to its robust performance, lower risk of overfitting, and superior interpretability.

| Gene | Primer | Sequence (5' -> 3') |
| --- | --- | --- |
| Cxcl12 | Forward | TATGGTGGTGCCGACTACAA |
| Reverse | TGCTTGTCCAGATGACTTCG |
| β-actin | Forward | GTGCTATGTTGCTCTAGACTTCG |
| Reverse | ATGCCACAGGATTCCATACC |

**Supplementary Table 1** Cxcl12 primers for qRT-PCR
